# Supplementary material for: Quantitative Brightness Analysis of Fluorescence Intensity Fluctuations in E. Coli
Source: PubMed Central journal article supplement (PMC4476568; doi:10.1371/journal.pone.0130063), 2015-06-22
Supplement: pone.0130063.s001.pdf [file pone.0130063.s001.pdf]

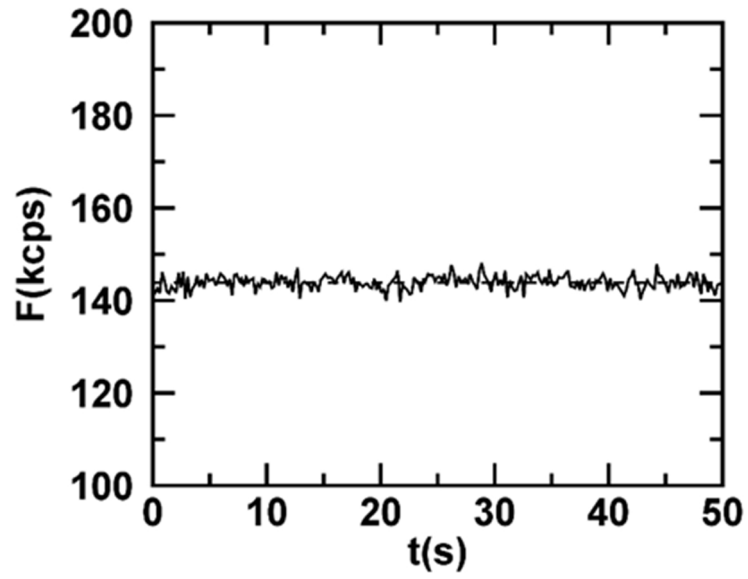

**S1 Fig. Fluorescence intensity trace  $F(t)$  of EGFP in U2OS cell.** The fluorescence intensity of EGFP measured inside the nucleus is stationary with an average value of 144 kcps.
