# Supplementary material for: Quantitative Brightness Analysis of Fluorescence Intensity Fluctuations in E. Coli
Source: PubMed Central journal article supplement (PMC4476568; doi:10.1371/journal.pone.0130063), 2015-06-22
Supplement: pone.0130063.s003.pdf [file pone.0130063.s003.pdf]

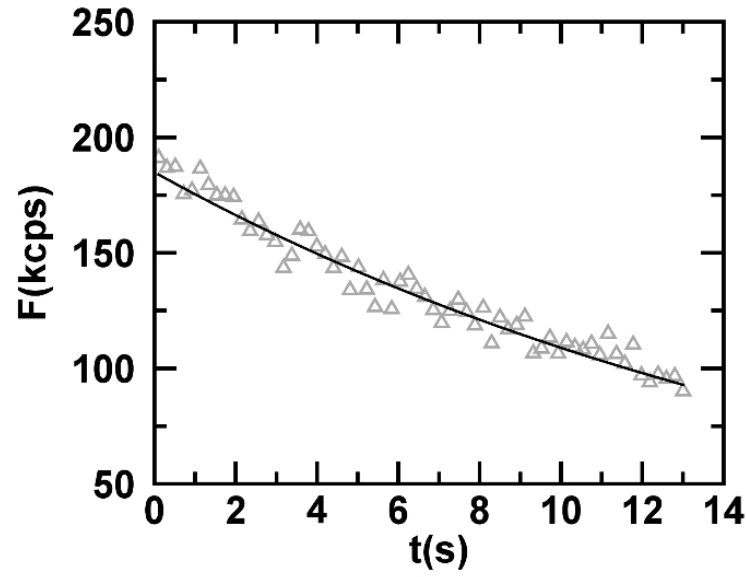

**S3 Fig. Fluorescence intensity trace  $F(t)$  of NTF2-EGFP in *E. coli* cell.** The experimental intensity data are described by an exponential decay (solid line) with  $F_0 = 185$  kcps and a rate coefficient  $k_D = 0.053 \text{ s}^{-1}$ .
